# 1 Wastewater surveillance pilot at US military installations: a cost 2 model analysis

3  
4 Jaleal Sanjak,<sup>1,5</sup> Erin M McAuley,<sup>1,5</sup> Richard Pinkham,<sup>1</sup> Jacob Tarnowski,<sup>1</sup> Nicole Miko,<sup>1</sup> Bridgette  
5 Rasmussen,<sup>1</sup> Christian Manalo,<sup>1</sup> Michael Goodson,<sup>2</sup> Blake Stamps,<sup>2</sup> Bryan D Necciai,<sup>3</sup> Shanmuga  
6 Sozhamannan,<sup>3,4</sup> Ezekiel J Maier<sup>1,6</sup>

7  
8 <sup>1</sup> Booz Allen Hamilton, Bethesda, MD 20814, USA

9 <sup>2</sup> United States Air Force Research Laboratory, Wright-Patterson Air Force Base, Ohio, USA

10 <sup>3</sup> Joint Program Executive Office for Chemical, Biological, Radiological and Nuclear Defense (JPEO-CBRND), Joint  
11 Project Lead for CBRND Enabling Biotechnologies (JPL CBRND EB), Frederick, MD 21702, USA

12 <sup>4</sup> Joint Research and Development, Inc, Stafford, VA 22556, USA

13 <sup>5</sup> These authors contributed equally to this work.

14 <sup>6</sup> Corresponding author: [maier\\_ezekiel@bah.com](mailto:maier_ezekiel@bah.com)

15

## 16 Abstract

### 17 Background:

18 The coronavirus disease 2019 (COVID-19) pandemic highlighted the need for pathogen surveillance  
19 systems to augment both early warning and outbreak monitoring/control efforts. Wastewater samples  
20 provide a rapid and accurate source of environmental surveillance data to complement direct patient  
21 sampling. Due to its global presence and critical missions, the US military is a leader in global pandemic  
22 preparedness efforts. Clinical testing for COVID-19 on US Air Force (USAF) bases (AFBs) was effective,  
23 but costly with respect to direct costs and indirect costs of lost time. To remain operating at peak  
24 capacity such bases sought a more passive surveillance option and piloted wastewater surveillance  
25 (WWS) at 17 AFBs to demonstrate feasibility, safety, and utility from May 2021 to January 2022.

### 26 Objective:

27 Here we model the costs of a wastewater program for pathogens of pandemic potential within the  
28 specific context of US military installations using assumptions based on the results of the USAF and Joint  
29 Program Executive Office for Chemical, Biological, Radiological and Nuclear Defense (JPEO-CBRND) pilot  
30 program. The objective was to determine the cost of deploying WWS to all AFBs, relative to clinical  
31 swab testing surveillance regimes.

### 32 Methods:

33 A simple WWS cost projection model was built based on subject matter expert input and actual costs  
34 incurred during a WWS pilot program at USAF AFBs. Several SARS-CoV-2 circulation scenarios were  
35 considered and costs of both WWS and clinical swab testing were projected. Break even analysis was  
36 conducted to determine how reduction in swab testing could open up space to enable WWS to occur in  
37 complement.

### 38 Results:

39 Our model confirms that wastewater surveillance is complimentary and highly cost-effective when  
40 compared to existing alternative forms of biosurveillance. We find that the cost of WWS was between  
41 \$10.5 - \$18.5 million less expensive annually in direct costs as compared to clinical swab testing  
42 surveillance. When indirect cost of lost work is incorporated, including assumed lost work required to go  
43 obtain a clinical swab test, we estimate that over two thirds of clinical swab testing could be maintained  
44 with no additional costs upon implementation of WWS.

## 45 Conclusions:

46 Our results support adoption of wastewater surveillance across US military installations as part of a  
47 more comprehensive and early warning system that will enable adaptive monitoring during disease  
48 outbreaks.

## 49 Keywords

50 Wastewater Surveillance, Cost Analysis, Military Health, Public Health

## 51 Introduction

52  
53 Many human pathogens are shed into bodily fluids during active infection and make their way into the  
54 sewage system along several routes. Therefore, wastewater sample collection is a viable approach to  
55 monitor for prevalence of pathogens [1], including those of pandemic potential and  
56 biodefense/biosecurity relevance. Early in the COVID-19 pandemic researchers identified that severe  
57 acute respiratory syndrome coronavirus 2 (SARS-CoV-2) ribonucleic acid (RNA) was shed into fecal  
58 matter at viral loads high enough to be detected in wastewater [2]. Therefore, the pre-existing field of  
59 wastewater-based epidemiology rallied to transition pre-existing methods [3] from academic research  
60 into scalable public health surveillance tools. Especially early in the COVID-19 pandemic, traditional  
61 swab-based testing could not scale quickly enough to serve as a reliable source of population level  
62 disease transmission data [4]. Multiple studies explored the efficacy of WWS as a stream of  
63 epidemiological data to complement case tracking for community transmission monitoring, finding that  
64 WWS data tracks with trends in clinical case reporting data [5–7]. While the statistical correlation  
65 between viral load in sewage and clinical indicators is strong, the exact quantitative relationship  
66 between individual-level testing and WWS data is complex and depends on a variety of factors related  
67 to the epidemiology of the outbreak as well as data collection and processing timelines [8]. Despite  
68 these complexities, WWS has been shown to be correlated with community infection dynamics [7] in  
69 addition to simply being an effective qualitative detection tool. Implementing WWS within institutional  
70 building complexes, such as college campuses, has unique challenges but also enables building-level  
71 resolution monitoring and early warning capabilities [9–12]. WWS can be a leading qualitative indicator  
72 of disease presence in a community when overall disease prevalence is low, making WWS a good  
73 candidate for broad scale baseline pathogen monitoring [13]. Because WWS is passive and independent  
74 of healthcare seeking behavior, it provides a data stream complementary to active tracking of infections  
75 or hospitalizations, which both have limitations. Additional benefits of WWS include the ability to  
76 monitor multiple pathogens, emerging viral variants, and non-biological hazards [14].

77  
78  
79 The US Government prioritized WWS to track the spread of COVID-19 and other diseases. For example,  
80 environmental monitoring for viral threats via wastewater surveillance is a key component of pandemic  
81 threat early-warning systems prioritized in the Biden Administration’s “American Pandemic  
82 Preparedness: Transforming our Capabilities” plan [15]. In addition, the Under Secretary of Defense for  
83 Personnel and Readiness (USD(P&R)) directed the US Department of Defense (DoD) to leverage  
84 alternative technologies, including wastewater surveillance, to supplement existing surveillance  
85 strategies in a memorandum titled “Consolidated Department of Defense Coronavirus Disease 2019  
86 Force Health Protection Guidance” [16]. The Centers for Disease Control and Prevention (CDC)  
87 established the National Waster Water Surveillance System [17] as a supplement to traditional  
88 diagnostic test surveillance systems by enabling efficient collection of community level samples. In  
89 addition, CDC is applying WWS within passenger airplanes as part of its Traveler Genomic Surveillance  
90 program [18]. Finally, in June 2021, the National Institute of Standards and Technology (NIST) and the  
91 Department of Homeland Security (DHS), Science and Technology Directorate convened a virtual  
92 workshop, entitled “Standards to Support an Enduring Capability in Wastewater Surveillance for Public

93 Health” to identify challenges and solutions for maturing an ensuring WWS capability for detecting and  
94 monitoring public health threats [19,20].

95  
96 As a result of practical successes in early research and implementation studies, best practices emerged  
97 for how to implement WWS at scale [4]. WWS can be an important tool for epidemiological monitoring  
98 and outbreak response if implemented with consideration of various challenges [21,22]; one important  
99 aspect to consider is avoiding redundancy with clinical testing by implementing a joint surveillance  
100 strategy. The design of a WWS data collection scheme and methods for analysis can have significant  
101 impacts on bias and interpretation of the data [23]. When implemented according to best practices  
102 WWS can be a cost-effective part of a public health response system [24]. Pairing WWS with clinical  
103 testing allows for both approaches to serve specific needs thereby enhancing the cost effectiveness of  
104 both [25].

105  
106 The DoD has installations around the globe with small compact living communities, some of which have  
107 overlapping watersheds with nearby cities. Tens of thousands of military personnel and civilians live and  
108 work in these installations. The DoD implements a four-tiered COVID-19 testing scheme. The first three  
109 tiers focus on staff at varying levels of critical service and deployment; Tier 4 sentinel surveillance is an  
110 asymptomatic testing program designed to cover all forces. Therefore, we focus on Tier 4 sentinel  
111 surveillance as our point of comparison for WWS cost since WWS is also suited to broad population  
112 monitoring.

113  
114 Similarities exist between DoD installations and other institutional building complexes like college  
115 campuses. Yet implementing a WWS system at DoD sites requires special planning considerations given  
116 unique operational constraints and global scale. To address these issues the DoD commissioned several  
117 WWS pilot studies aimed at figuring out the logistical, operational, and financial aspects of  
118 implementing a WWS program. One such study demonstrated the effectiveness of wastewater  
119 screening of blackwater from Coast Guard vessels [26]. Another study focused on WWS at AFBs; the  
120 USAF and JPEO-CBRND WWS pilot study was larger than previous DoD pilots and more representative of  
121 US military installations globally. Here we analyze the cost effectiveness of WWS within the DoD  
122 context, based on the results from that Air Force and JPEO-CBRND WWS pilot study. We developed a  
123 simple cost model that includes upfront capital expenditures, operational expenditures, and indirect  
124 costs of lost work time. Further, we perform break-even analysis to explore how traditional swab testing  
125 and WWS could be carried out in tandem within the budget of existing swab testing schemes. We  
126 conclude that WWS is cost-effective as a complimentary passive community level disease surveillance  
127 scheme, within the context of AFBs and therefore likely would be cost-effective as a DoD wide global  
128 multi-pathogen monitoring system that could be operated in complement to swab-based testing in the  
129 event of future disease outbreaks.

130

## 131 **Methods**

### 132 **WWS pilot study design**

133 To assess feasibility of WWS for SARS-CoV-2 within the USAF context, a multidisciplinary working group  
134 was assembled, and a pilot scale implementation was organized. The effort was also coordinated with  
135 DoD partners through collaboration with the Office of the Assistant Secretary of Defense for Health  
136 Affairs and JPEO-CBRND. A total of 26 AFBs were initially contacted for enrollment either via an  
137 invitation from a Public Health Emergency Officer or a USAF Air Staff Logistics Directorate of Civil  
138 Engineers memo and all 26 sites expressed initial interest. Wastewater surveillance was ultimately  
139 piloted at 17 AFBs to demonstrate feasibility, safety, and utility from May 2021 to January 2022. During  
140 the initial phase, conducted June through August 2021, wastewater surveillance techniques were

141 deployed for testing at three remote sites. Next, WWS was evaluated at a larger scale, with 14  
142 additional sites completing standardized procedures to collect and process wastewater samples once  
143 per week. The project utilized a portable quantitative polymerase chain reaction (PCR) instrument  
144 (qPCR, Biomeme®) [27] and digital PCR (dPCR). AFB site personnel were trained to identify detectable  
145 SARS-CoV-2 using both systems. In addition, a passive sampling device was prototyped to decrease costs  
146 associated with expensive auto-sampler procurement.

147

### 148 Collection of tier 4 sentinel surveillance and WWS costs

149 We gathered known costs or made estimates of direct costs for all activities required to implement both  
150 Tier 4 diagnostic testing and WWS protocols. Costs of WWS were based on actual material costs and  
151 levels of effort from the WWS pilot study. Costs of Tier 4 diagnostic testing were based directly on USAF  
152 experience. Costs included fixed and variable equipment and material costs, and the costs of USAF labor  
153 (salaries and benefits) and estimated fully loaded contractor labor (billing) rates. Specific cost parameter  
154 values and sources are shown in Table 1.

155

156 Materials costs modeled for Tier 4 swab testing only include the total cost of the PCR swab test, which  
157 was estimated based on input from DoD subject matter experts with visibility into budgeting and  
158 therefore reflects actual cost incurred. The remaining direct Tier 4 costs were associated with labor  
159 including the nurse and lab tech time for swab sampling and data management and reporting. We  
160 obtained average USAF Nurse base salary values from Salary, a leading industry source of compensation  
161 data [28]. Lab tech and USAF general staff salary information were obtained from Indeed [29] and  
162 Glassdoor [30] respectively, which are both crowdsourced databases of employers and employees. We  
163 assumed a flat benefits rate of 35% and this was added on top of base compensation values to estimate  
164 the staff total compensation rates.

165

166 WWS labor included a variety of USAF staff and contractors for base and sampling site selection,  
167 onboarding bases and training base personnel, obtaining samples, sample processing, data management  
168 and reporting, vendor management, and ongoing support to participating bases. The estimate of hourly  
169 rate for sample collectors was obtained from publicly available USAF pay tables[31] and contractor rates  
170 were estimated based on technical and pricing subject matter expert input and informed by relevant,  
171 historical experience.

172

### 173 Economic cost model

174 Our analysis addressed the cost of implementing WWS at 82 AFBs, which was the forecasted number of  
175 bases expected if a full scale WWS program were to reach maturity [32]. The cost of WWS was  
176 evaluated relative to implementing Tier 4 diagnostic testing for the same AFBs. We developed a simple  
177 spreadsheet model in Microsoft Excel (Version 2302) to calculate and compare total costs for each  
178 surveillance protocol across different scenarios. We assume that there are negligible, if any, startup  
179 costs to Tier 4 PCR Surveillance. We also assume that bases would be equipped with suitable resources  
180 for Tier 4 surveillance since the pandemic spurred those initial investments. Expected time for staff to go  
181 an obtain a clinical PCR test is calculated as the major source of lost work time for Tier 4 surveillance.  
182 We assume that there is minimal loss of work under WWS. WWS does not require time spent out of  
183 operational environments for staff to get tested, like in Tier 4 diagnostic testing surveillance. Additional  
184 staffing required to administer the WWS program and conduct tests is included. The spreadsheet  
185 containing the model calculations is provided in **Supplemental Table 1**.

186

## 187 Cost-effectiveness analysis

188 We modeled several scenarios to explore the potential costs associated with a range of implementation  
189 plans and disease outbreak circumstances. Specifically, the study considered a baseline COVID-19  
190 monitoring scenario (scenario 1), three additional scenarios that explore higher WWS frequency for  
191 COVID-19 monitoring (scenario 2), and two scenarios that include increased testing during the 4-month  
192 simulated outbreaks (scenarios 3 and 4). For each scenario, the number of outbreak months and  
193 number of monthly tests (per base) are described in Table 2. The Air Force Tier 4 sentinel surveillance in  
194 practice carried out an average of 293 swab tests per base per month and we assumed that testing  
195 would double during outbreaks. The WWS surveillance pilots operated on a once weekly basis, but some  
196 evidence exists supporting the benefits of increased sampling frequency. Therefore, we considered  
197 increases in baseline sampling and large increases in sampling during outbreaks.

198

## 199 Results

200 17 out of the 26 AFBs recorded WWS data during the period from September 2021 to January 2022  
201 (Figure 1); demonstrating that sewage can be safely sampled in a field environment and at a fixed lab.  
202 The procedures implemented at sites during the pilot were designed to collect and process wastewater  
203 samples once per week. Yet, in total, 52 data submissions were recorded and amounted to 45 unique  
204 viable sample records. As illustrated in Figure 2, invalid submissions included duplicate records and  
205 samples with PCR reaction issues such incubation temperature and sample concentration. Three sites  
206 were used strictly for an early feasibility pilot stage in which protocols were established. The remaining  
207 14 sites submitted data collected over partially overlapping periods of 4.5 weeks on average. In total,  
208 the pilot study identified 25 positive (or presumptive positive) samples and 20 negative samples. The 25  
209 positive samples came from 12 of the 14 sites that collected samples systematically. However, the sites  
210 did not collect the same number of samples and two sites that detected no positives were also the sites  
211 that submitted the fewest total samples. This procedure validated the feasibility of implementing WWS  
212 at AFBs, but also highlighted considerable site-to-site variability in executing systematic sampling  
213 procedures. These results provided a case study from which we derive assumptions for the economic  
214 cost model.

215

216 The cost of SARS-CoV-2 WWS was estimated and compared to the estimated cost of Tier 4 COVID-19  
217 sentinel surveillance (asymptomatic testing) across 82 selected AFBs. The four scenarios modeled are  
218 described in Table 2. For each scenario we use the cost model parameters to estimate total direct and  
219 indirect costs of both WWS and Tier 4 surveillance. Table 3 shows the total annual costs (in millions of  
220 2021 dollars) for each scenario at 82 AFBs. Under baseline COVID-19 monitoring, scenarios 1 and 2, we  
221 estimate that the direct costs of the Tier 4 sentinel surveillance program would cost approximately \$18  
222 million dollars. In the same scenarios, we estimate that WWS would directly cost between \$5.4 million  
223 with once weekly testing (scenario 1) to \$7.4 million with twice weekly testing (scenario 2).

224

225 During an outbreak, here defined broadly as either local or national level transmission that is sufficiently  
226 high such that strict control measures are put in place, enhanced surveillance is needed to manage  
227 response. Therefore, under COVID-19 outbreak monitoring scenarios 3 and 4 we estimate the direct  
228 costs of Tier 4 sentinel surveillance to be \$24 million dollars. The cost of WWS may also go up,  
229 depending on policy decision making; for example, sites could choose to test more frequently or utilize  
230 alternative pathogen detection methods. In scenario 3, only Tier 4 sentinel surveillance is increased  
231 during outbreak response and so the estimated WWS direct costs remain \$5.4 million. In contrast,  
232 scenario 4 assumed that the usage of both Tier 4 sentinel surveillance and WWS go up during outbreak  
233 response and so the estimated WWS direct costs increase to \$8.2 million.

234

235 Tier 4 sentinel surveillance PCR testing requires that Air Force staff take time out of their workday to get  
236 tested and this leads to additional effective costs. We use our model to estimate the cost of lost work,  
237 based on typical staff salary ranges and time required to get tested. In scenarios with baseline testing,  
238 we estimate that there would be a \$5.6 million cost for the loss of work associated with Tier 4 sentinel  
239 surveillance PCR testing. During a disease outbreak scenario leading to increased testing, we estimate  
240 the cost of lost work to be \$7.5 million. In contrast, WWS does not place any burden on staff not  
241 associated directly with implementation of the surveillance program.

242  
243 We find that the cost of WWS was between \$10.5 - \$18.5 million less expensive annually in direct costs  
244 as compared to Tier 4 sentinel surveillance, and that Tier 4 sentinel surveillance has an additional cost of  
245 \$5.6-\$7.5 million annually in Air Force personnel lost work time for testing. If WWS were implemented  
246 there would still be capacity to carry out a substantial amount of Tier 4 sentinel surveillance PCR testing.  
247 We quantified the break-even point for combined WWS and PCR testing by calculating the number of  
248 PCR swab tests that could be conducted per base per month under the WWS paradigm while breaking  
249 even with the higher cost of the original Tier 4 testing scheme. The results of our break-even analysis are  
250 shown in Table 4.

251  
252 To estimate break-even point based on direct costs only, we simply take the direct cost differences and  
253 divide by the direct cost per swab test (\$62.39/test for materials and labor), spread across 82 bases and  
254 12 months. Under COVID-19 baseline monitoring with once weekly WWS (scenario 1) we estimate that  
255 an additional 204 swab tests per AFB per month could be added to the WWS protocol for the same cost  
256 as the original Tier 4 sentinel surveillance scheme. If WWS was increased to twice weekly (scenario 2)  
257 then we estimate that 171 swab tests could still be performed at the break-even point. When cost of  
258 lost work is incorporated, including assumed lost work for swabs used to reach break-even point, we  
259 estimate that 225 and 200 additional swab tests could be performed in scenarios 1 and 2 respectively.  
260 During an outbreak, the demands for all forms of surveillance increases and so more swab tests can be  
261 performed at the break-even cost point. When the cost of lost work is included, we estimate that 323  
262 and 289 additional swab tests could be performed for outbreak scenarios 3 and 4 respectively. Across all  
263 scenarios, we estimate that more than half of the Tier 4 sentinel surveillance program could be  
264 maintained while WWS is implemented in parallel with no additional cost, i.e., at the break-even point.

## 265 266 Discussion

267 The DoD SARS-CoV-2 WWS surveillance pilot studies demonstrated the feasibility of implementing WWS  
268 at military installations. The pilot studies revealed some important technical considerations. For  
269 example, although dPCR was extremely sensitive, it required shipping of wastewater from remote sites  
270 to a centralized location, potentially limiting its use in largescale deployment. Portable qPCR had a lower  
271 throughput of samples than dPCR but was simple to use at the point of sampling. Our simple cost model  
272 took these lessons into account.

273  
274 The pilot studies also provide real world data on the costs associated with WWS in comparison to  
275 standard swab-based testing, including materials costs and labor requirements. In general, WWS for  
276 SARS-CoV-2 may offer several benefits, including 1) earlier detection of outbreaks, 2) lower cost and  
277 burden for community-wide coverage compared to diagnostic testing, and 3) detection of viral  
278 presence, regardless of symptoms. Coupling our analysis with the overall results of the DoD pilot studies  
279 suggests that those benefits are likely to transfer to the DoD. Specifically, our model suggests  
280 deployment of WWS to AFBs would be substantially more cost effective than broad asymptomatic swab  
281 testing. Our break-even analysis indicates that without allocating additional funding to surveillance  
282 efforts that WWS could be implemented for AFB level monitoring and swab testing could be used for

283 more targeted purposes or simply in parallel. It is important to note that swab testing and WWS do not  
284 provide the exact same information. Swab testing can enable individual level actions, such as  
285 quarantining and contact tracing, and higher resolution data. Therefore, tradeoffs between the public  
286 health benefits of WWS and swab testing will need to be determined on a case-by-case basis. These  
287 findings apply do both baseline COVID-19 monitoring and in scenarios where outbreaks are occurring on  
288 bases throughout the year.

289  
290 Our cost model was intentionally simplistic to enhance transparency for decisionmakers. That simplicity  
291 is also a limitation in that there may be unforeseen complexities and costs associated with scaling the  
292 WWS program beyond the pilot sites. In addition, our cost data is primarily derived from the Air Force  
293 WWS pilot program, and it is possible that facilities associated with other branches of the DoD may  
294 require different considerations. Many of our parameter estimates were obtained from subject matter  
295 experts, i.e., individual DoD staff and contractors associated with the pilot studies, as opposed to an  
296 independent review of pilot study budgets. Therefore, our cost estimates should not be interpreted as  
297 formal financial forecasts.

298  
299 Another limitation of our analysis is the lack of uncertainty estimation. Any formal program level  
300 financial forecast would require uncertainty ranges to be estimated along with point cost estimates.  
301 However, in our present work many of the materials costs were obtained directly from individuals with  
302 knowledge of the actual costs incurred during the pilot studies. Therefore, our model could be framed as  
303 an estimate of what the actual cost would have been if the pilot was carried out at all AFBs rather than a  
304 forecast of the costs of a DoD wide program—although we believe our work is germane to that topic.  
305 Furthermore, systematic uncertainty in labor and materials costs due to changes in supply chain issues  
306 and inflation are likely correlated such that a proper uncertainty propagation would require estimating  
307 the joint distribution of costs, which is beyond the scope of our efforts. Given the magnitude of the  
308 point difference and the consensus in the literature that WWS is less expensive for population level  
309 monitoring—albeit not necessarily cost-effective if implemented poorly [22]—we believe that our results  
310 are qualitatively robust to underlying uncertainty in the data and model specification.

311  
312 In conclusion, we find that the Air Force WWS pilot was a cost-effective complement to standard swab-  
313 based testing as implemented in the Tier 4 sentinel surveillance program. We believe that WWS and  
314 swab-based testing have differing strengths and weaknesses; implementing both approaches in tandem  
315 offers the opportunity to specialize. Looking ahead beyond the COVID-19 pandemic the DoD can be an  
316 important partner in global pandemic and all-hazard preparedness efforts. WWS is uniquely well suited  
317 to multi-threat biological surveillance and our results suggest that adoption of WWS across US military  
318 installations would help deliver a more comprehensive early warning system. A DoD wide WWS would  
319 complement civilian efforts like the National Wastewater Surveillance System and enable rapidly  
320 scalable outbreak monitoring in the event of future disease outbreaks.

## 321 322 **Acknowledgements**

323 We would like to thank Helen Phipps for helpful input. JDV and SS designed the study. EMM managed  
324 the study and carried out the analysis. RP, JT, and EJM carried out the analysis. JS wrote the manuscript.

## 325 326 **Conflicts of Interest**

327 This study was funded/supported by the United States Air Force and the Joint Program Executive Office  
328 for Chemical, Biological, Radiological and Nuclear Defense (JPEO-CBRND). Contract Support was  
329 provided by Booz Allen Hamilton.

330  
331  
332  
333  
334  
335  
336  
337  
338  
339

## Disclaimer

The views expressed in this manuscript are those of the authors and do not necessarily reflect the official policy or position of the Air Force, the Joint Program Executive Office for Chemical, Biological, Radiological and Nuclear Defense (JPEO-CBRND), the Department of Defense, or the U.S. Government. Included references to commercial products do not constitute endorsement by the Department of Defense.

## Figures

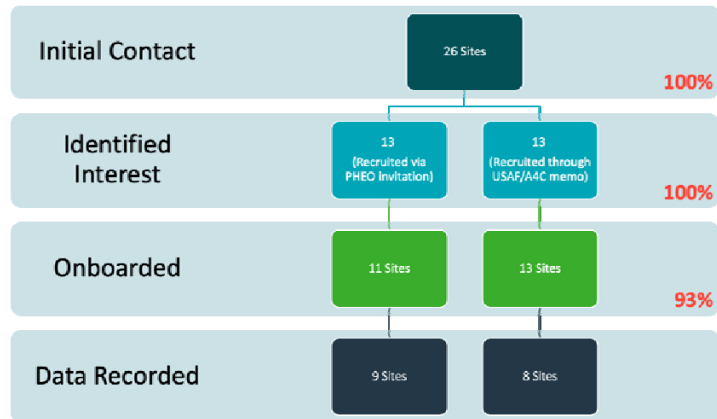

340  
341

Figure 1 Data collection procedure

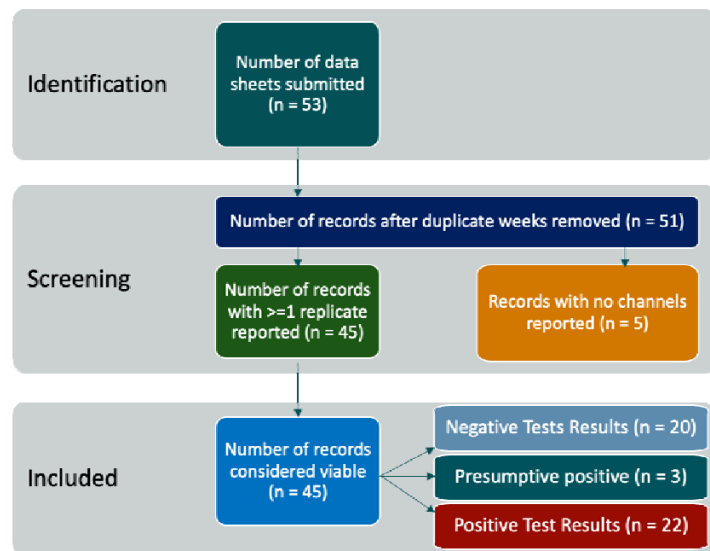

342  
343

Figure 2 Data preprocessing workflow

## Tables

344  
345  
346  
347

Table 1. Cost analysis model parameters, with the values used and the sources of the values.

| Parameter | Value | Source |
|-----------|-------|--------|
|-----------|-------|--------|



---

## Tier 4 Parameters

---

|                                                  |             |                                                                             |
|--------------------------------------------------|-------------|-----------------------------------------------------------------------------|
| Number of PCR Tests (Non-Outbreak)               | 293         | Tier 4 PCR Surveillance □ Plan (low end of estimate)                        |
| Number of PCR Tests (Outbreak)                   | 586         | Tier 4 PCR Surveillance □ Plan (high end of estimate)                       |
| Testing Time (Minutes per Patient)               | 30          | Estimate                                                                    |
| Sample Time (Lab Tech Minutes)                   | 10          | Estimate                                                                    |
| Sample Time (Nurse Minutes)                      | 5           | Estimate                                                                    |
| Data Management and Reporting (Nurse Minutes)    | 5           | Estimate                                                                    |
| Data Management and Reporting (Lab Tech Minutes) | 2           | Estimate                                                                    |
| Benefits Adjustment to Salaries                  | 35%         | Common practice; consistent with BLS data                                   |
| Nurse - Average Salary Including Benefits        | \$87,750.00 | [28]                                                                        |
| Lab Tech - Average Salary Including Benefits     | \$55,687.50 | [29]                                                                        |
| Average AF Salary Including Benefits             | \$81,000.00 | [30]                                                                        |
| Material Cost per PCR Test                       | \$50.00     | DoD SME                                                                     |
| Total Cost Per PCR Test (Including Labor)        | \$62.39     | Estimate - Material cost of a PCR test plus the cost of labor per PCR test. |

## WWS Parameters

|                                           |                |                                                      |
|-------------------------------------------|----------------|------------------------------------------------------|
| Wastewater Tests Per Month (Non-Outbreak) | 4.33 (1/week)  | Phase 2 testing cadence                              |
| Wastewater Tests Per Month (Outbreak)     | 21.66 (5/week) | Estimate                                             |
| Android Device Cost                       | \$600.00       | DoD SME / Vendor                                     |
| Thermocycler Cost                         | \$9,950.00     | DoD SME / Vendor                                     |
| Cooker and Cooking Container              | \$271.88       | DoD SME / Vendor                                     |
| Biomeme Sample Preparation Tray           | \$200.00       | DoD SME / Vendor                                     |
| DynaMag-50 Magnet                         | \$960.00       | DoD SME / Vendor                                     |
| M1 Sample Prep Cartridge Kit (Per Test)   | \$45.00        | DoD SME / Vendor                                     |
| Go-Strips (Per Test)                      | \$300          | DoD SME / Vendor                                     |
| Materials Cost Per Wastewater Test        | \$54.41        | Vendor                                               |
| Supply Shipping (Boxes)                   | \$22.66        | DoD SME                                              |
| Supply Shipping (FedEx)                   | \$34.66        | DoD SME                                              |
| Labor Hours Per Test                      | 6              | Air Force & Booz Allen Estimate                      |
| Hourly Wage of Sampler                    | \$13.10        | Airforce.com                                         |
| Base Selection (Per Base)                 | \$2,050.40     | Technical and pricing SME for pilot study activities |

|                                                                 |            |                                                      |
|-----------------------------------------------------------------|------------|------------------------------------------------------|
| Base Onboarding and Training (Per Base)                         | \$2,184.93 | Technical and pricing SME for pilot study activities |
| Surveillance, Data Management and Reporting (per base per week) | \$265.35   | Technical and pricing SME for pilot study activities |
| Ongoing Support (per base per week)                             | \$87.95    | Technical and pricing SME for pilot study activities |
| Vendor Management (per base per week)                           | \$90.29    | Technical and pricing SME for pilot study activities |
| Program Coordination and Oversight (per base per week)          | \$105.53   | Technical and pricing SME for pilot study activities |
| SME: subject matter expert                                      |            |                                                      |

348  
349  
350

Table 2. Cost analysis model scenarios.

| Scenario                                                   | Outbreak Months/Year | Tier 4 Swab Tests per Base per Month | WWS Tests per Base per Month                          |
|------------------------------------------------------------|----------------------|--------------------------------------|-------------------------------------------------------|
| 1. COVID-19 Monitoring                                     | None                 | 293                                  | 4.33 (1/week)                                         |
| 2. COVID-19 Monitoring with Higher WWS Frequency           | None                 | 293                                  | 8.66 (2/week)                                         |
| 3. Outbreak Scenario with Increased Tier 4 Testing         | 4                    | 293 normally<br>586 in outbreaks     | 4.33 (1/week)<br>in all months                        |
| 4. Outbreak Scenario with Increased Tier 4 and WWS Testing | 4                    | 293 normally<br>586 in outbreaks     | 4.33 (1/week) normally<br>21.66 (5/week) in outbreaks |

351  
352  
353  
354

Table 3. Cost effectiveness analysis results Columns 2 and 3 represent direct costs to administer Tier 4 surveillance and WWS respectively. Column 4 shows the annual cost difference between Tier 4 surveillance and WWS. Column 5 is the indirect cost of staff taking time away from work for Tier 4 surveillance.

| Scenario                                                     | Tier 4 Direct Cost | WWS Direct Cost | Cost Difference | Cost of Lost Work |
|--------------------------------------------------------------|--------------------|-----------------|-----------------|-------------------|
| 1. COVID-19 Monitoring                                       | \$18.0 M           | \$5.4 M         | \$12.5 M        | \$5.6 M           |
| 2. COVID-19 Monitoring with Higher WWS Frequency             | \$18.0 M           | \$7.5 M         | \$10.5 M        | \$5.6 M           |
| 3. Outbreak Scenario A with Increased Tier 4 Testing         | \$24.0 M           | \$5.4 M         | \$18.5 M        | \$7.5 M           |
| 4. Outbreak Scenario B with Increased Tier 4 and WWS Testing | \$24.0 M           | \$8.2 M         | \$15.8 M        | \$7.5 M           |

355  
356  
357  
358  
359

Table 4. Breakeven analysis results.

| Scenario | Breakeven Swab Tests | Breakeven Swab Tests |
|----------|----------------------|----------------------|
|----------|----------------------|----------------------|

|                                                               | <b>Based on Direct Cost<br/>Difference Only<sup>1</sup><br/>(per AFB/month)</b> | <b>Including Cost of Lost<br/>Work<sup>1</sup><br/>(per AFB/month)</b> |
|---------------------------------------------------------------|---------------------------------------------------------------------------------|------------------------------------------------------------------------|
| 1. COVID-19 Monitoring                                        | 204                                                                             | 225                                                                    |
| 2. COVID-19 Monitoring with Higher<br>WWS Frequency           | 171                                                                             | 200                                                                    |
| 3. Outbreak Scenario with Increased<br>Tier 4 Testing         | 302                                                                             | 323                                                                    |
| 4. Outbreak Scenario with Increased<br>Tier 4 and WWS Testing | 258                                                                             | 289                                                                    |

360 <sup>1</sup>Swab tests per base per month added to WWS at the breakeven point relative to Tier 4 costs; in outbreak scenarios,  
361 these figures reflect a full year (4 outbreak months and 8 non-outbreak months).  
362

363

## 363 References

- 364 1. Sinclair RG, Choi CY, Riley MR, Gerba CP. Pathogen surveillance through monitoring of sewer  
365 systems. *Adv Appl Microbiol* 2008;65:249–269. PMID:19026868
- 366 2. Medema G, Heijnen L, Elsinga G, Italiaander R, Brouwer A. Presence of SARS-Coronavirus-2 RNA in  
367 Sewage and Correlation with Reported COVID-19 Prevalence in the Early Stage of the Epidemic in  
368 The Netherlands. *Environ Sci Technol Lett* 2020 May 20;acs.estlett.0c00357. PMID:null
- 369 3. Sims N, Kasprzyk-Hordern B. Future perspectives of wastewater-based epidemiology: Monitoring  
370 infectious disease spread and resistance to the community level. *Environment International* 2020  
371 Jun 1;139:105689. doi: 10.1016/j.envint.2020.105689
- 372 4. Keshaviah A, Hu XC, Henry M. Developing a Flexible National Wastewater Surveillance System for  
373 COVID-19 and Beyond. *Environmental Health Perspectives* 2021 Apr 20;129(4):045002. doi:  
374 10.1289/EHP8572
- 375 5. Ahmed W, Tschärke B, Bertsch PM, Bibby K, Bivins A, Choi P, Clarke L, Dwyer J, Edson J, Nguyen  
376 TMH, O’Brien JW, Simpson SL, Sherman P, Thomas KV, Verhagen R, Zaugg J, Mueller JF. SARS-CoV-2  
377 RNA monitoring in wastewater as a potential early warning system for COVID-19 transmission in the  
378 community: A temporal case study. *Sci Total Environ* 2021 Mar 20;761:144216. PMID:33360129
- 379 6. Feng S, Roguet A, McClary-Gutierrez JS, Newton RJ, Kloczko N, Meiman JG, McLellan SL. Evaluation  
380 of Sampling, Analysis, and Normalization Methods for SARS-CoV-2 Concentrations in Wastewater to  
381 Assess COVID-19 Burdens in Wisconsin Communities. *ACS EST Water* 2021 Aug 13;1(8):1955–1965.  
382 doi: 10.1021/acsestwater.1c00160
- 383 7. Peccia J, Zulli A, Brackney DE, Grubaugh ND, Kaplan EH, Casanovas-Massana A, Ko AI, Malik AA,  
384 Wang D, Wang M, Warren JL, Weinberger DM, Arnold W, Omer SB. Measurement of SARS-CoV-2  
385 RNA in wastewater tracks community infection dynamics. *Nat Biotechnol* Nature Publishing Group;  
386 2020 Oct;38(10):1164–1167. doi: 10.1038/s41587-020-0684-z
- 387 8. Olesen SW, Imakaev M, Duvall C. Making waves: Defining the lead time of wastewater-based  
388 epidemiology for COVID-19. *Water Res* 2021 Sep 1;202:117433. PMID:34304074
- 389 9. Betancourt WQ, Schmitz BW, Innes GK, Prasek SM, Pogreba Brown KM, Stark ER, Foster AR, Sprissler  
390 RS, Harris DT, Sherchan SP, Gerba CP, Pepper IL. COVID-19 containment on a college campus via

- 391 wastewater-based epidemiology, targeted clinical testing and an intervention. *Sci Total Environ*  
392 2021 Jul 20;779:146408. PMID:33743467
- 393 10. Karthikeyan S, Nguyen A, McDonald D, Zong Y, Ronquillo N, Ren J, Zou J, Farmer S, Humphrey G,  
394 Henderson D, Javidi T, Messer K, Anderson C, Schooley R, Martin NK, Knight R. Rapid, Large-Scale  
395 Wastewater Surveillance and Automated Reporting System Enable Early Detection of Nearly 85% of  
396 COVID-19 Cases on a University Campus. *mSystems American Society for Microbiology*; 2021 Aug  
397 10;6(4):e00793-21. doi: 10.1128/mSystems.00793-21
- 398 11. Landstrom M, Braun E, Larson E, Miller M, Holm GH. Efficacy of SARS-CoV-2 wastewater surveillance  
399 for detection of COVID-19 at a residential private college. *FEMS Microbes* 2022 Jan 1;3:xtac008. doi:  
400 10.1093/femsmc/xtac008
- 401 12. Scott LC, Aubee A, Babahaji L, Vigil K, Tims S, Aw TG. Targeted wastewater surveillance of SARS-CoV-  
402 2 on a university campus for COVID-19 outbreak detection and mitigation. *Environ Res* 2021  
403 Sep;200:111374. PMID:34058182
- 404 13. Kirby AE. Using Wastewater Surveillance Data to Support the COVID-19 Response — United States,  
405 2020–2021. *MMWR Morb Mortal Wkly Rep* 2021;70. doi: 10.15585/mmwr.mm7036a2
- 406 14. Li L, Mazurowski L, Dewan A, Carine M, Haak L, Guarin TC, Dastjerdi NG, Gerrity D, Mentzer C,  
407 Pagilla KR. Longitudinal monitoring of SARS-CoV-2 in wastewater using viral genetic markers and the  
408 estimation of unconfirmed COVID-19 cases. *Sci Total Environ* 2022 Apr 15;817:152958.  
409 PMID:35016937
- 410 15. Lander ES, Sullivan JJ. American Pandemic Preparedness: Transforming Our Capabilities. Available  
411 from: [whitehouse.gov](https://www.whitehouse.gov)
- 412 16. CONSOLIDATED-DEPARTMENT-OF-DEFENSE-CORONAVIRUS-DISEASE-2019-FORCE-HEALTH-  
413 PROTECTION-GUIDANCE-REVISION-5.pdf. Available from:  
414 [https://media.defense.gov/2023/Mar/28/2003187831/-1/-1/1/CONSOLIDATED-DEPARTMENT-OF-  
415 DEFENSE-CORONAVIRUS-DISEASE-2019-FORCE-HEALTH-PROTECTION-GUIDANCE-REVISION-5.PDF](https://media.defense.gov/2023/Mar/28/2003187831/-1/-1/1/CONSOLIDATED-DEPARTMENT-OF-DEFENSE-CORONAVIRUS-DISEASE-2019-FORCE-HEALTH-PROTECTION-GUIDANCE-REVISION-5.PDF)  
416 [accessed May 24, 2023]
- 417 17. National Wastewater Surveillance System. Centers for Disease Control and Prevention. 2023.  
418 Available from: <https://www.cdc.gov/nwss/wastewater-surveillance.html> [accessed May 4, 2023]
- 419 18. Traveler-Based Genomic Surveillance for Early Detection of New SARS-CoV-2 Variants | Travelers'  
420 Health | CDC. Available from: <https://wwwnc.cdc.gov/travel/page/travel-genomic-surveillance>  
421 [accessed Sep 25, 2023]
- 422 19. Lin N, Servetas S, Jackson S, Lippa K, Parratt K, Mattson P, Beahn C, Mattioli M, Gutierrez S, Focazio  
423 M, Smith T, Storella P, Wright S. Report on the DHS/NIST Workshop on Standards for an Enduring  
424 Capability in Wastewater Surveillance for Public Health (SWWS Workshop). NIST Nancy Lin,  
425 Stephanie Servetas, Scott Jackson, Katrice Lippa, Kirsten Parratt, Philip Mattson, Clare Beahn, Mia  
426 Mattioli, Sally Gutierrez, Michael Focazio, Ted Smith, Paul Storella, Sarah Wright; 2022 Aug 16;  
427 Available from: [https://www.nist.gov/publications/report-dhsnist-workshop-standards-enduring-  
428 capability-wastewater-surveillance-public](https://www.nist.gov/publications/report-dhsnist-workshop-standards-enduring-capability-wastewater-surveillance-public) [accessed May 24, 2023]

- 429 20. Servetas SL, Parratt KH, Brinkman NE, Shanks OC, Smith T, Mattson PJ, Lin NJ. Standards to support  
430 an enduring capability in wastewater surveillance for public health: Where are we? *Case Studies in*  
431 *Chemical and Environmental Engineering* 2022 Dec;6:100247. PMID:null
- 432 21. O’Keeffe J. Wastewater-based epidemiology: current uses and future opportunities as a public  
433 health surveillance tool. *Environ Health Rev* 2021 Nov;64(3):44–52. doi: 10.5864/d2021-015
- 434 22. Safford HR, Shapiro K, Bischel HN. Wastewater analysis can be a powerful public health tool—if it’s  
435 done sensibly. *Proceedings of the National Academy of Sciences* 2022 Feb 8;119(6):e2119600119.  
436 doi: 10.1073/pnas.2119600119
- 437 23. Safford H, Zuniga-Montanez RE, Kim M, Wu X, Wei L, Sharpnack J, Shapiro K, Bischel HN.  
438 Wastewater-Based Epidemiology for COVID-19: Handling qPCR Nondetects and Comparing Spatially  
439 Granular Wastewater and Clinical Data Trends. *ACS EST Water* 2022 Nov 11;2(11):2114–2124. doi:  
440 10.1021/acsestwater.2c00053
- 441 24. Hart OE, Halden RU. Computational analysis of SARS-CoV-2/COVID-19 surveillance by wastewater-  
442 based epidemiology locally and globally: Feasibility, economy, opportunities and challenges. *Science*  
443 *of The Total Environment* 2020 Aug 15;730:138875. doi: 10.1016/j.scitotenv.2020.138875
- 444 25. Wright J, Driver EM, Bowes DA, Johnston B, Halden RU. Comparison of high-frequency in-pipe SARS-  
445 CoV-2 wastewater-based surveillance to concurrent COVID-19 random clinical testing on a public  
446 U.S. university campus. *Sci Total Environ* 2022 May 10;820:152877. PMID:34998780
- 447 26. Hall GJ, Page EJ, Rhee M, Hay C, Krause A, Langenbacher E, Ruth A, Grenier S, Duran AP, Kamara I,  
448 Iskander JK, Thomas DL, Bock E, Porta N, Pharo J, Osterink BA, Zelmanowitz S, Fleischmann CM,  
449 Liyanage D, Gray JP. Wastewater Surveillance of U.S. Coast Guard Installations and Seagoing Military  
450 Vessels to Mitigate the Risk of COVID-19 Outbreaks. *medRxiv*; 2022. p. 2022.02.05.22269021. doi:  
451 10.1101/2022.02.05.22269021
- 452 27. Biomeme SARS-CoV-2 Real-Time RT-PCR Test - Letter of Authorization | FDA. Available from:  
453 <https://www.fda.gov/media/141049> [accessed May 24, 2023]
- 454 28. Salary.com S built by: U.S. Air Force (USAF) Nurse Salary. Salary.com. Available from:  
455 <https://www.salary.com/research/salary/employer/u-s-air-force-usaf/nurse-salary> [accessed Oct  
456 19, 2023]
- 457 29. Laboratory technician salary in United States. Available from:  
458 <https://www.indeed.com/career/laboratory-technician/salaries> [accessed Oct 19, 2023]
- 459 30. How Much Does US Air Force Pay in 2023? (41,869 Salaries). Glassdoor. Available from:  
460 <https://www.glassdoor.com/Salary/US-Air-Force-Salaries-E41283.htm> [accessed Oct 19, 2023]
- 461 31. Air Force Active Duty Benefits - U.S. Air Force. Available from: [https://www.airforce.com/pay-and-](https://www.airforce.com/pay-and-benefits/air-force-benefits)  
462 [benefits/air-force-benefits](https://www.airforce.com/pay-and-benefits/air-force-benefits) [accessed Oct 19, 2023]
- 463 32. Locations - U.S. Air Force. Available from: <https://www.airforce.com/ways-to-serve/locations>  
464 [accessed May 24, 2023]
